# Supplementary material for: OMI Satellite Observations of decadal changes in Ground-Level Sulfur Dioxide over North America
Source: Copernicus journal article supplement (doi:10.5194/acp-2016-1070), 2016-12-05
Supplement: Supplementary file 1 [file acp-2016-1070-supplement.pdf]

Supplementary material for:

## **OMI Satellite Observations of decadal changes in Ground-Level Sulfur Dioxide over North America**

5 Shailesh K. Kharol<sup>1</sup>, Chris A. McLinden<sup>1</sup>, Christopher E. Sioris<sup>1</sup>, Mark W. Shephard<sup>1</sup>, Vitali Fioletov<sup>1</sup>,  
Aaron van Donkelaar<sup>2</sup>, Sajeev Philip<sup>2</sup>, Randall V. Martin<sup>2</sup>

<sup>1</sup>Air Quality Research Division, Environment and Climate Change Canada, Toronto, Ontario M3H 5T4, Canada

<sup>2</sup>Department of Physics and Atmospheric Science, Dalhousie University, Halifax, Nova Scotia, Canada

*Correspondence to:* S. K. Kharol (shailesh.kharol@canada.ca)

10

15

20

25

30

35

## OMI SO<sub>2</sub> Surface Mixing Ratio

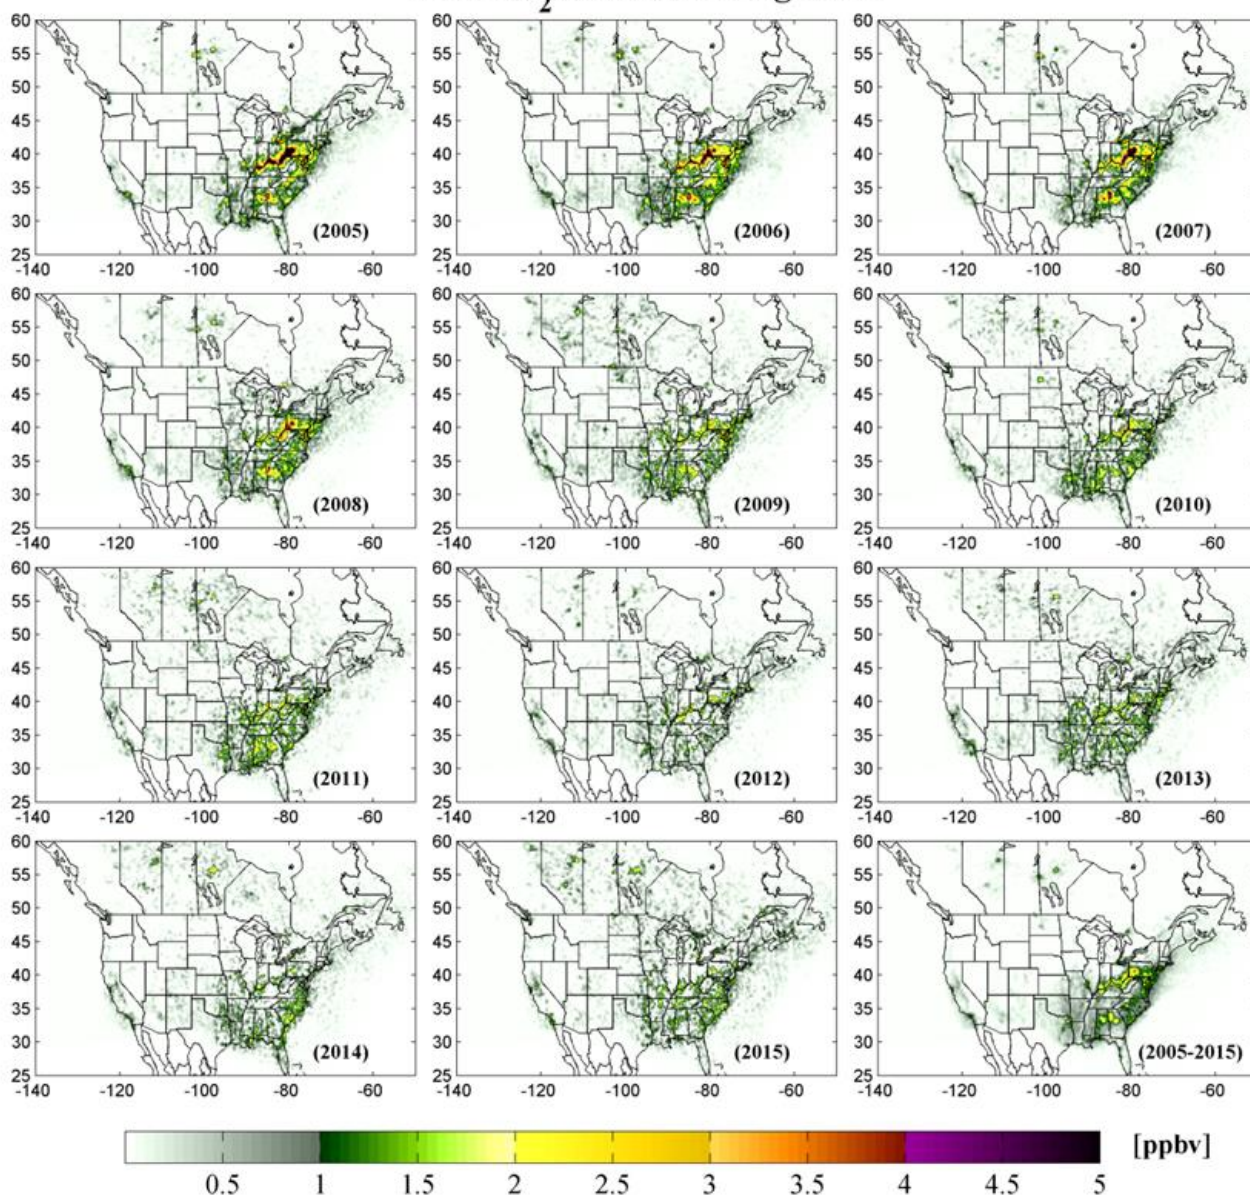

Figure S1: Spatial distribution of annual mean OMI-derived ground-level SO<sub>2</sub> mixing ratio over North America for the period of 2005 to 2015.

5

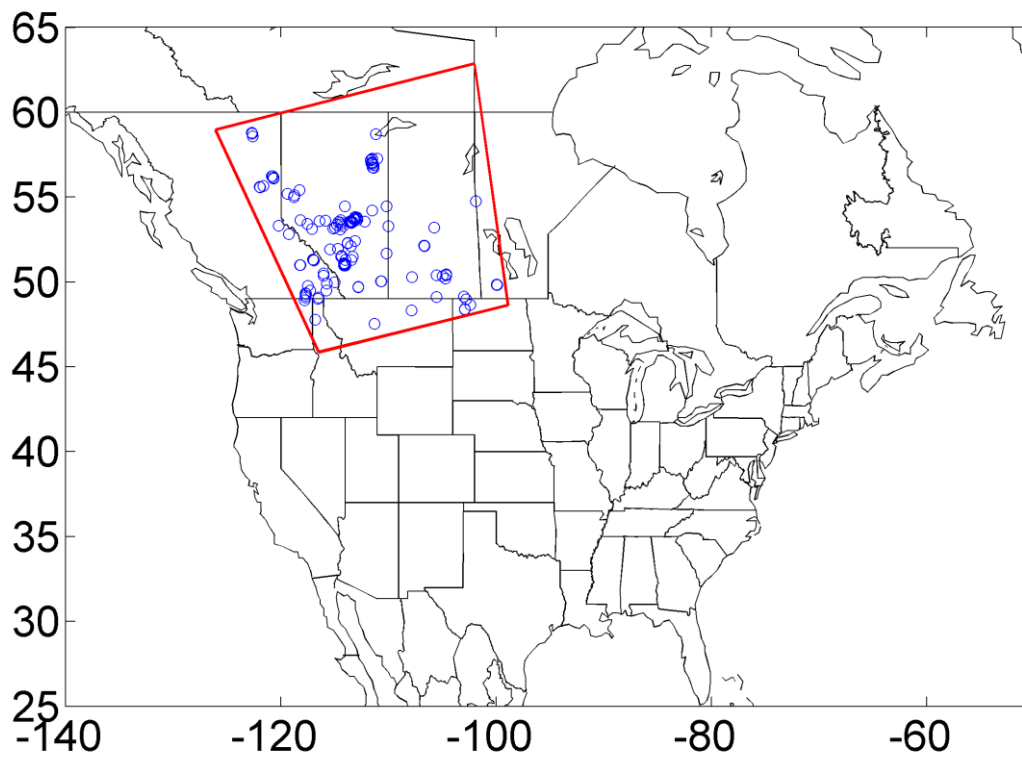

**Figure S2: Geographical location of GEM-MACH model domain is shown with a red polygon. The in-situ monitors locations are shown with blue circles.**

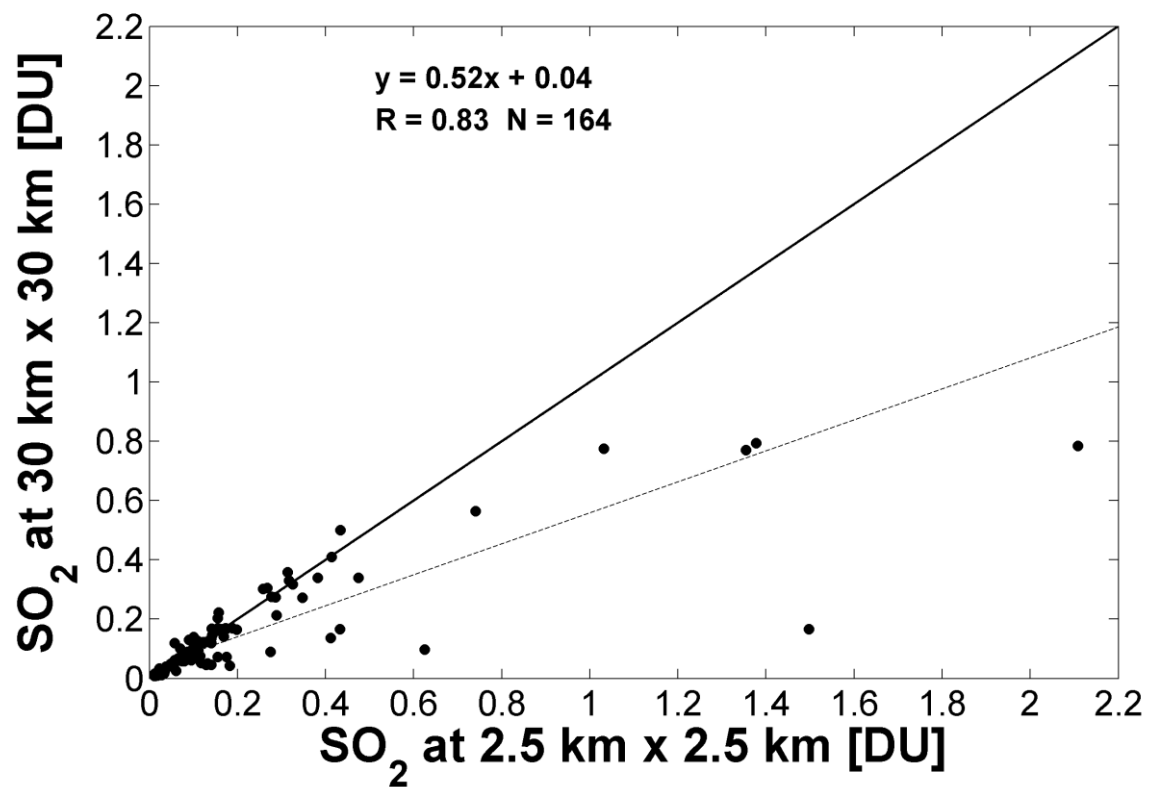

Figure S3: Scatter plot of GEM-MACH SO<sub>2</sub> column.

5

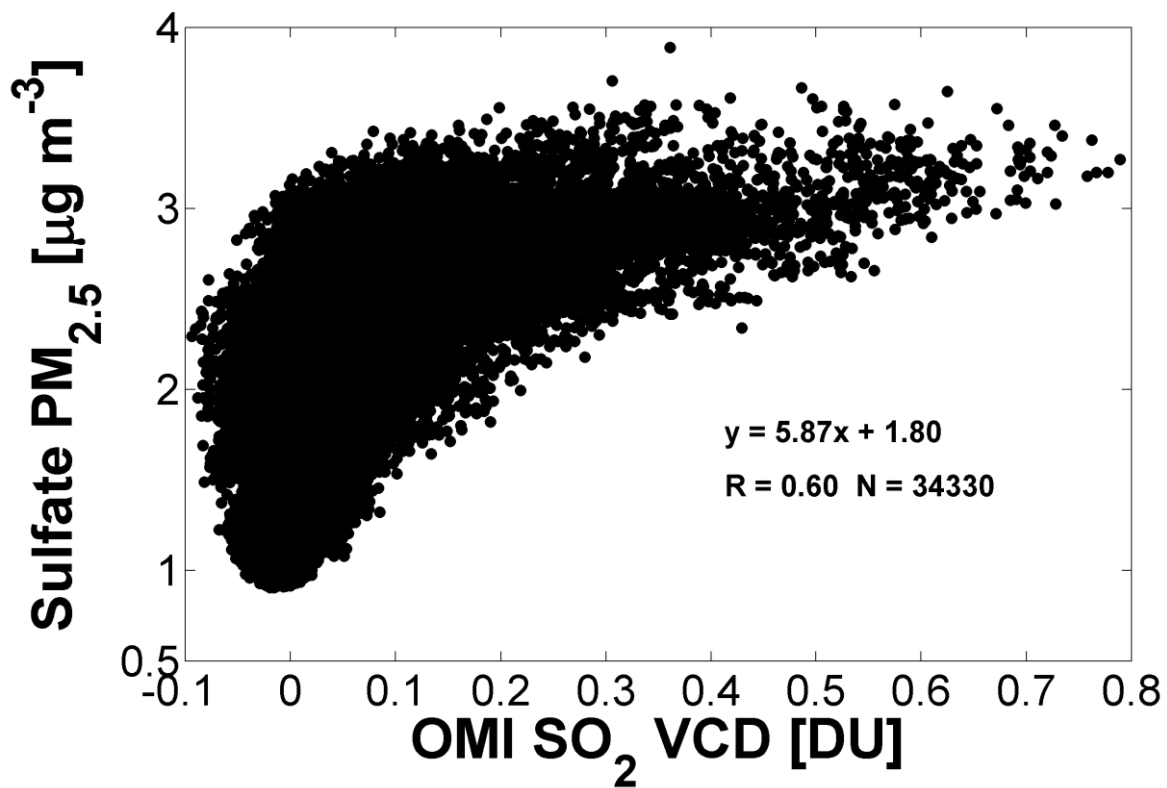

Figure S4: Scatter plot of OMI SO<sub>2</sub> VCD versus sulfate PM<sub>2.5</sub> over eastern North America.
